# Supplementary material for: Neutrophil Extracellular Traps Upregulate p21 and Suppress Cell Cycle Progression to Impair Endothelial Regeneration after Inflammatory Lung Injury
Source: MDPI journal article supplement (doi:10.3390/jcm13051204), 2024-02-20
Supplement: s1 [file s1]

**Supplementary Table S1. Primer sequences for RT-qPCR.**

| <b>Gene Name</b>    | <b>Forward</b>          | <b>Reverse</b>          |
|---------------------|-------------------------|-------------------------|
| Human-CDKN1A        | TGTCCGTCAGAACCCATGC     | AAAGTCGAAGTTCCATCGCTC   |
| Human-CDKN2A        | GGGTTTTTCGTGGTTCACATCC  | CTAGACGCTGGCTCCTCAGTA   |
| Human-CDKN1B        | AACGTGCGAGTGTCTAACGG    | CCCTCTAGGGGTTTGTGATTCT  |
| Human-CDK1          | AAACTACAGGTCAAGTGGTAGCC | TCCTGCATAAGCACATCCTGA   |
| Human-CDK2          | CCAGGAGTTACTTCTATGCCTGA | TTCATCCAGGGGAGGTACAAC   |
| Human-CDK4          | ATGGCTACCTCTCGATATGAGC  | CATTGGGGACTCTCACACTCT   |
| Human-CCNA1         | GAGGTCCCGATGCTTGTCAG    | GTTAGCAGCCCTAGCACTGTC   |
| Human-CCNB1         | AATAAGGCGAAGATCAACATGGC | TTTGTTACCAATGTCCCCAAGAG |
| Human-CCNB2         | CCGACGGTGTCCAGTGATTT    | TGTTGTTTTGGTGGGTTGAACT  |
| Human-GAPDH         | GGAGCGAGATCCCTCCAAAAT   | GGCTGTTGTCATACTTCTCATGG |
| Mouse-TF            | CTGGAAAAACAAGTGCTTCTCG  | ACAGAGAGGACCTTTGCTTCA   |
| Mouse-IL-1 $\beta$  | GAAATGCCACCTTTTGACAGTG  | TGGATGCTCTCATCAGGACAG   |
| Mouse-IL-6          | CTGCAAGAGACTTCCATCCAG   | AGTGGTATAGACAGGTCTGTTGG |
| Mouse-TNF- $\alpha$ | CAGGCGGTGCCTATGTCTC     | CGATCACCCCGAAGTTCAGTAG  |
| Mouse-GAPDH         | TGACCTCAACTACATGGTCTACA | CTTCCCATTCTCGGCCTTG     |
